# Supplementary material for: Effects of Sweet-Liking on Body Composition Depend on Age and Lifestyle: A Challenge to the Simple Sweet-Liking—Obesity Hypothesis
Source: MDPI journal article supplement (doi:10.3390/nu12092702), 2020-09-04
Supplement: s1 [file s1]

## Supplementary Material

**Table S1.** Behavioural characteristics by country.

|                                                                       | UK<br><i>N</i> = 146 | US<br><i>N</i> = 124 |
|-----------------------------------------------------------------------|----------------------|----------------------|
|                                                                       | <i>Mean (SEM)</i>    |                      |
| <b>Three Factor Eating Questionnaire</b>                              |                      |                      |
| Restraint eating                                                      | 7.54 (.364)          | 9.44 (.407)*         |
| Disinhibition                                                         | 5.59 (.242)          | 6.31 (.290)          |
| Trait hunger                                                          | 6.77 (.292)          | 5.70 (.293)*         |
| <b>Barratt's Impulsiveness Scale</b>                                  |                      |                      |
| Attentional impulsivity                                               | 16.95 (.308)         | 15.98 (.317)*        |
| Motor impulsivity                                                     | 22.10 (.370)         | 21.18 (.345)         |
| Non-planning impulsivity                                              | 24.68 (.380)         | 21.87 (.396)*        |
| <b>Sensitivity to Punishment –Sensitivity to Reward Questionnaire</b> |                      |                      |
| Sensitivity to Punishment                                             | 12.07 (.425)         | 12.49 (.484)         |
| Sensitivity to Reward                                                 | 12.36 (.304)         | 11.46 (.351)         |
| <b>Arnett's Inventory of Sensation Seeking</b>                        |                      |                      |
| Intensity seeking                                                     | 24.64 (.353)         | 23.36 (.385)         |
| Novelty seeking                                                       | 27.49 (.366)         | 25.91 (.362)*        |

The asterisk (\*) indicates a significant cross-country difference ( $p < .05$ ) for the values within the same row after adjusting for age. Data from participants (UK:  $n = 2$ ; US:  $n = 2$ ) opting for the answer phrased as 'I am currently on a diet' at post-recruitment are not presented.

**Table S2.** Lifestyle characteristics by country.

|                                           | <b>UK</b><br>N = 146 | <b>US</b><br>N = 124 |
|-------------------------------------------|----------------------|----------------------|
|                                           | <b>N (%)</b>         |                      |
| <b>DiETING</b>                            |                      |                      |
| Never                                     | 93 (63.7)            | 71 (57.3)            |
| Once or more times in the past            | 53 (36.3)            | 53 (42.7)            |
| <b>Breakfast consumption*</b>             |                      |                      |
| 5-7 days/week                             | 116 (79.4)           | 87 (70.2)            |
| 2-4 days/week                             | 23 (15.8)            | 19 (15.3)            |
| 0-1 days/week                             | 7 (4.8)              | 18 (14.5)            |
| <b>Physical activity level</b>            |                      |                      |
| Low                                       | 13 (8.9)             | 8 (6.5)              |
| Moderate                                  | 51 (34.9)            | 35 (28.2)            |
| High                                      | 82 (56.2)            | 81 (65.3)            |
|                                           | <b>Mean (SEM)</b>    |                      |
| <b>Average sleep duration</b> (hours/day) | 8.84 (.104)          | 8.29 (.075)*         |

SEM, Standard Error of the Mean. All frequencies reported refer to valid percentages. The asterisk (\*) indicates a significant cross-country difference ( $p < .05$ ) for the values within the same row or under the same variable after adjusting for age. Data from participants (UK:  $n = 2$ ; US:  $n = 2$ ) opting for the answer phrased as 'I am currently on a diet' at post-recruitment are not presented.

**Table S3.** Anthropometric characteristics by country.

|                                                       | <b>UK</b><br>N = 145          | <b>US</b><br>N = 116 |
|-------------------------------------------------------|-------------------------------|----------------------|
|                                                       | <i>Median (Q1, Q3)</i>        |                      |
| <b>BMI (kg/m<sup>2</sup>)</b>                         | 22.1 (20.6, 24.4)             | 23.6 (21.2, 27.7)    |
|                                                       | <i>Mean (SEM)<sup>1</sup></i> |                      |
| <b>Total body fat (%)</b>                             | 23.7 (.552)                   | 26.1 (.619)          |
| <b>Fat free mass (kg)</b>                             | 49.41 (.475)                  | 50.77 (.532)         |
| <b>Waist circumference (cm)</b>                       | 74.9 (.889)                   | 81.5 (.995)*         |
| <b>Waist circumference to hip circumference ratio</b> | .767 (.006)                   | .798 (.006)*         |

BMI, body mass index; Q1, 25th percentile; Q3, 75th percentile; SEM, Standard Error of the Mean. The asterisk (\*) indicates a significant cross-country difference ( $p < .05$ ) for the values within the same row after adjusting for age. <sup>1</sup>All Mean (SEM) values are the estimated marginal means as they were calculated after considering the effects of sex.

**Table S4.** Interaction effects of age on phenotypic differences in anthropometric measures

|                       | <i>B (SE)</i>         | $\beta$     | <b>95%CI</b><br><i>(Lower Bound, Upper Bound)</i> | <i>t</i>     | <i>p</i>    | <i>R</i> <sup>2</sup> |
|-----------------------|-----------------------|-------------|---------------------------------------------------|--------------|-------------|-----------------------|
| <b>log10BMI</b>       |                       |             |                                                   |              |             |                       |
| <i>Step 1</i>         |                       |             |                                                   |              |             | .004                  |
| Constant              | 1.378 (.013)          |             | (1.353, 1.403)                                    | 109.235      | .000        |                       |
| Phenotype             | -.006 (.006)          | -.060       | (-.018, .006)                                     | -.941        | .348        |                       |
| <i>Step 2</i>         |                       |             |                                                   |              |             | .084                  |
| Constant              | 1.004 (.081)          |             | (.8441, .164)                                     | 12.344       | .000        |                       |
| Phenotype             | -.008 (.006)          | -.084       | (-.020, .003)                                     | -1.379       | .169        |                       |
| log <sub>10</sub> Age | <b>.282 (.061)</b>    | <b>.284</b> | <b>(.162, .401)</b>                               | <b>4.648</b> | <b>.000</b> |                       |
| <b>Total Body Fat</b> |                       |             |                                                   |              |             |                       |
| <i>Step 1</i>         |                       |             |                                                   |              |             | .377                  |
| Constant              | 16.674 (1.331)        |             | (14.051, 19.296)                                  | 12.523       | .000        |                       |
| Phenotype             | .137 (.605)           | .011        | (-1.055, 1.328)                                   | .226         | .821        |                       |
| Sex                   | 11.280 (.923)         | .616        | (9.461, 13.098)                                   | 12.218       | .000        |                       |
| <i>Step 2</i>         |                       |             |                                                   |              |             | .410                  |
| Constant              | -15.671 (8.415)       |             | (-32.246, .905)                                   | -1.862       | .064        |                       |
| Phenotype             | -.134 (.592)          | -.011       | (-1.301, 1.033)                                   | -.226        | .821        |                       |
| Sex                   | 12.090 (.922)         | .661        | (10.275, 13.906)                                  | 13.117       | .000        |                       |
| log <sub>10</sub> Age | <b>24.069 (6.188)</b> | <b>.195</b> | <b>(11.881, 36.257)</b>                           | <b>3.890</b> | <b>.000</b> |                       |
| <b>Fat Free Mass</b>  |                       |             |                                                   |              |             |                       |
| <i>Step 1</i>         |                       |             |                                                   |              |             | .687                  |
| Constant              | 64.653 (1.130)        |             | (62.426, 66.880)                                  | 57.190       | .000        |                       |
| Phenotype             | -1.150 (.514)         | -.080       | (-2.161, -.138)                                   | -2.238       | .026        |                       |
| Sex                   | -17.920 (.784)        | -.817       | (-19.464, -16.377)                                | -22.861      | .000        |                       |
| <i>Step 2</i>         |                       |             |                                                   |              |             | .693                  |
| Constant              | 48.277 (7.286)        |             | (33.927, 62.627)                                  | 6.626        | .000        |                       |
| Phenotype             | -1.287 (.513)         | -.089       | (-2.297, -.276)                                   | -2.509       | .013        |                       |
| Sex                   | -17.510 (.798)        | -.798       | (-19.082, -15.938)                                | -21.943      | .000        |                       |
| log <sub>10</sub> Age | <b>12.186 (5.357)</b> | <b>.082</b> | <b>(1.635, 22.738)</b>                            | <b>2.275</b> | <b>.024</b> |                       |

| <b>Waist Circumference</b> |                        |             |                         |              |             |
|----------------------------|------------------------|-------------|-------------------------|--------------|-------------|
| <i>Step 1</i>              |                        |             |                         |              | .093        |
| Constant                   | 84.888 (2.190)         |             | (80.575, 89.202)        | 38.765       | .000        |
| Phenotype                  | -.999 (.995)           | -.061       | (-2.958, .961)          | -1.004       | .316        |
| Sex                        | -7.582 (1.518)         | -.304       | (-10.573, -4.592)       | -4.994       | .000        |
| <i>Step 2</i>              |                        |             |                         |              | .171        |
| Constant                   | 18.948 (13.611)        |             | (-7.861, 45.757)        | 1.392        | .165        |
| Phenotype                  | -1.551 (.958)          | -.095       | (-3.438, .336)          | -1.619       | .107        |
| Sex                        | -5.930 (1.491)         | -.238       | (-8.866, -2.994)        | -3.978       | .000        |
| log <sub>10</sub> Age      | <b>49.070 (10.008)</b> | <b>.292</b> | <b>(29.358, 68.782)</b> | <b>4.903</b> | <b>.000</b> |
| <b>Waist to Hip Ratio</b>  |                        |             |                         |              |             |
| <i>Step 1</i>              |                        |             |                         |              | .149        |
| Constant                   | .836 (.014)            |             | (.809, .863)            | 60.172       | .000        |
| Phenotype                  | -.007 (.006)           | -.066       | (-.019, .005)           | -1.114       | .266        |
| Sex                        | -.062 (.010)           | -.381       | (-.081, -.043)          | -6.471       | .000        |
| <i>Step 2</i>              |                        |             |                         |              | .178        |
| Constant                   | .562 (.089)            |             | (.387, .737)            | 6.335        | .000        |
| Phenotype                  | -.009 (.006)           | -.087       | (-.022, .003)           | -1.493       | .137        |
| Sex                        | -.055 (.010)           | -.339       | (-.075, -.036)          | -5.708       | .000        |
| log <sub>10</sub> Age      | <b>.204 (.065)</b>     | <b>.185</b> | <b>(.075, .332)</b>     | <b>3.124</b> | <b>.002</b> |

BMI, Body Mass Index; CI, Confidence Interval; SE, Standard Error

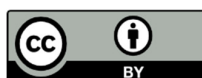

© 2020 by the authors. Submitted for possible open access publication under the terms and conditions of the Creative Commons Attribution (CC BY) license (<http://creativecommons.org/licenses/by/4.0/>).
